# Supplementary material
Source: PubMed Central journal article supplement (PMC4439012)
Supplement: NIHMS553359-supplement-01.pdf [file NIHMS553359-supplement-01.pdf]

## Supporting Information

# **The effect of side-chain functionality and hydrophobicity on the gene delivery capabilities of cationic helical polypeptides**

Rujing Zhang, Nan Zheng, Ziyuan Song, Lichen Yin\*, Jianjun Cheng\*

Department of Materials Science and Engineering, University of Illinois at Urbana–  
Champaign, 1304 W Green Street, Urbana, IL, 61801, USA

\*Corresponding authors: Email: [jianjunc@illinois.edu](mailto:jianjunc@illinois.edu); Phone: 217-244-3924; Fax: 217-333-2736; [lcyin@illinois.edu](mailto:lcyin@illinois.edu); Phone: 217-244-2835

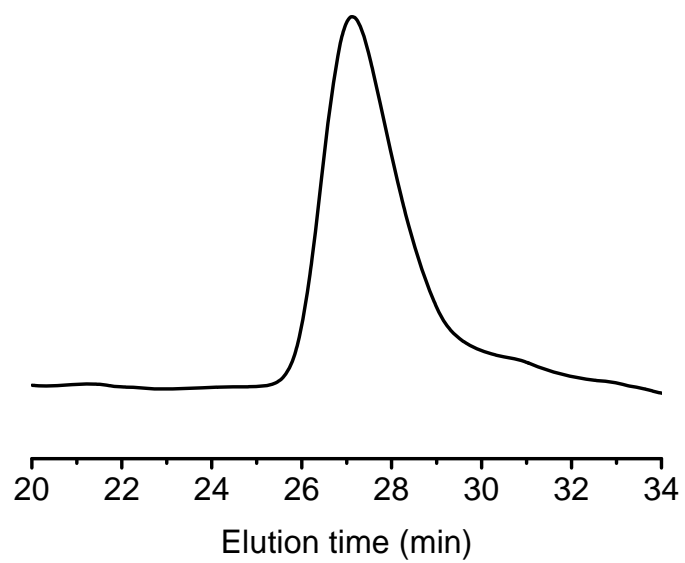

Fig. S1. GPC trace of poly( $\gamma$ -(4-propargyloxybenzyl)-L-glutamate) (PPOBLG).

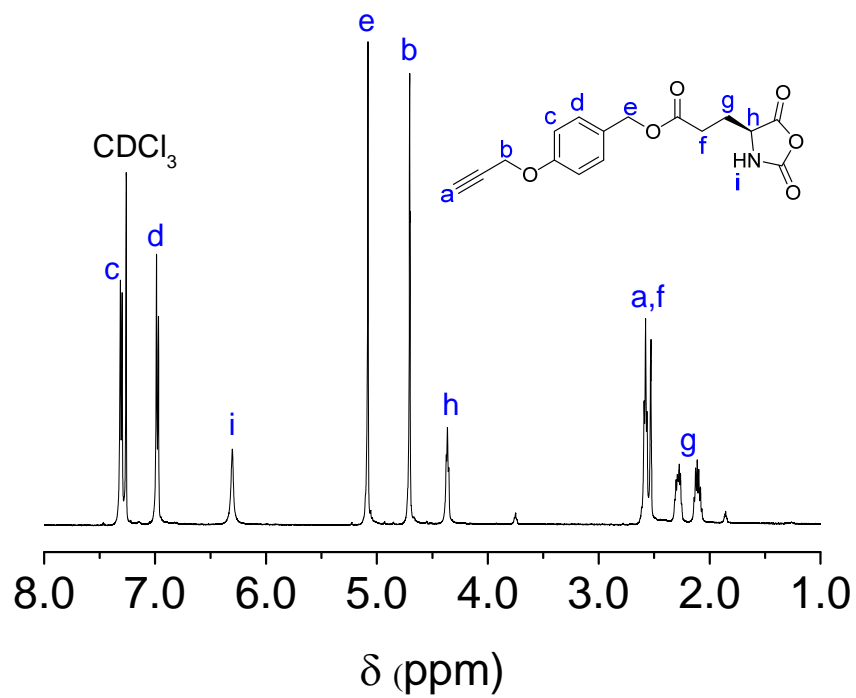

Fig. S2. <sup>1</sup>H NMR spectrum of POB-L-Glu-NCA in CDCl<sub>3</sub>.

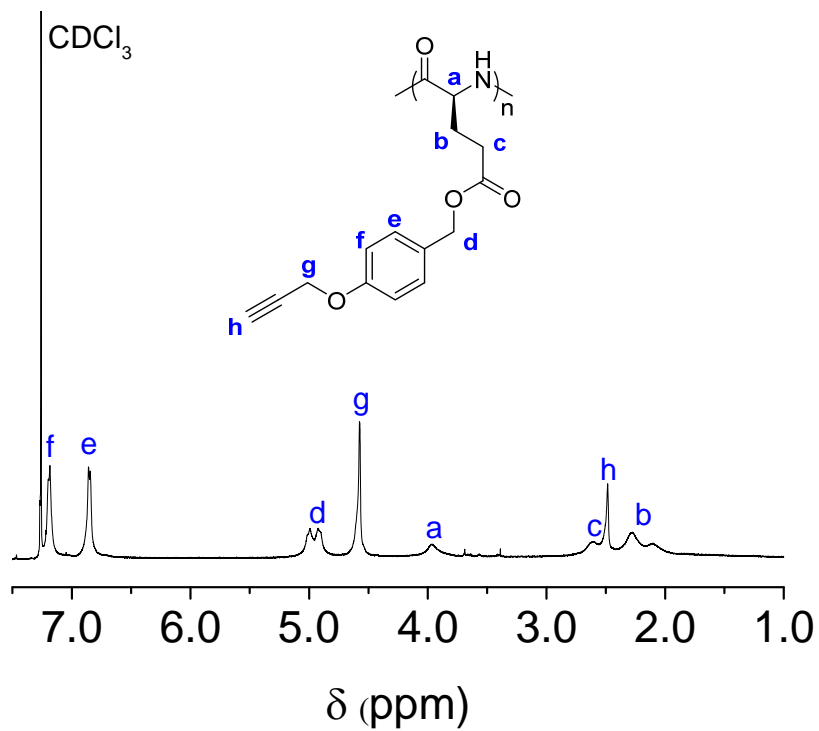

Fig. S3.  $^1\text{H}$  NMR spectrum of PPOBLG in  $\text{CDCl}_3$ .

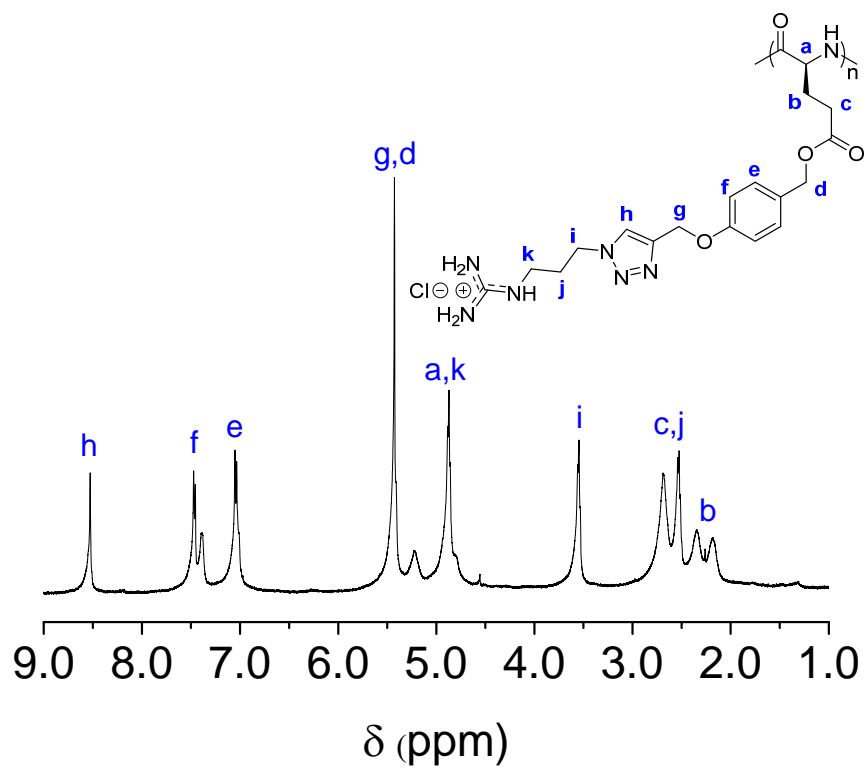

Fig. S4.  $^1\text{H}$  NMR spectrum of polypeptide G3 in  $\text{TFA-d}$ .

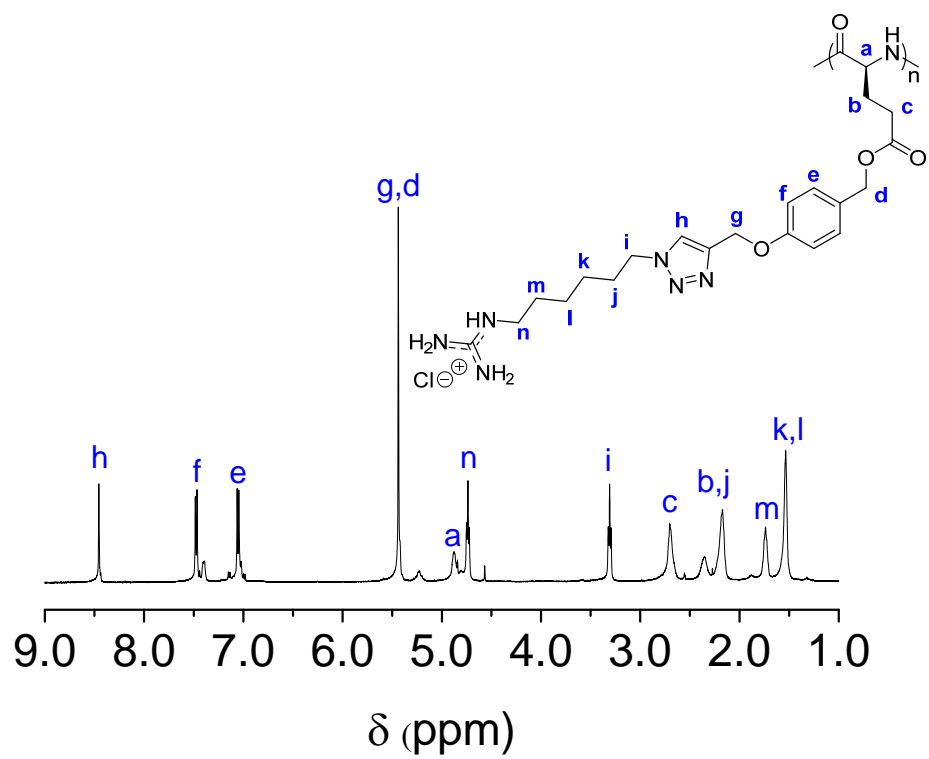

Fig. S5.  $^1\text{H}$  NMR spectrum of polypeptide G6 in  $\text{TFA-d}$ .

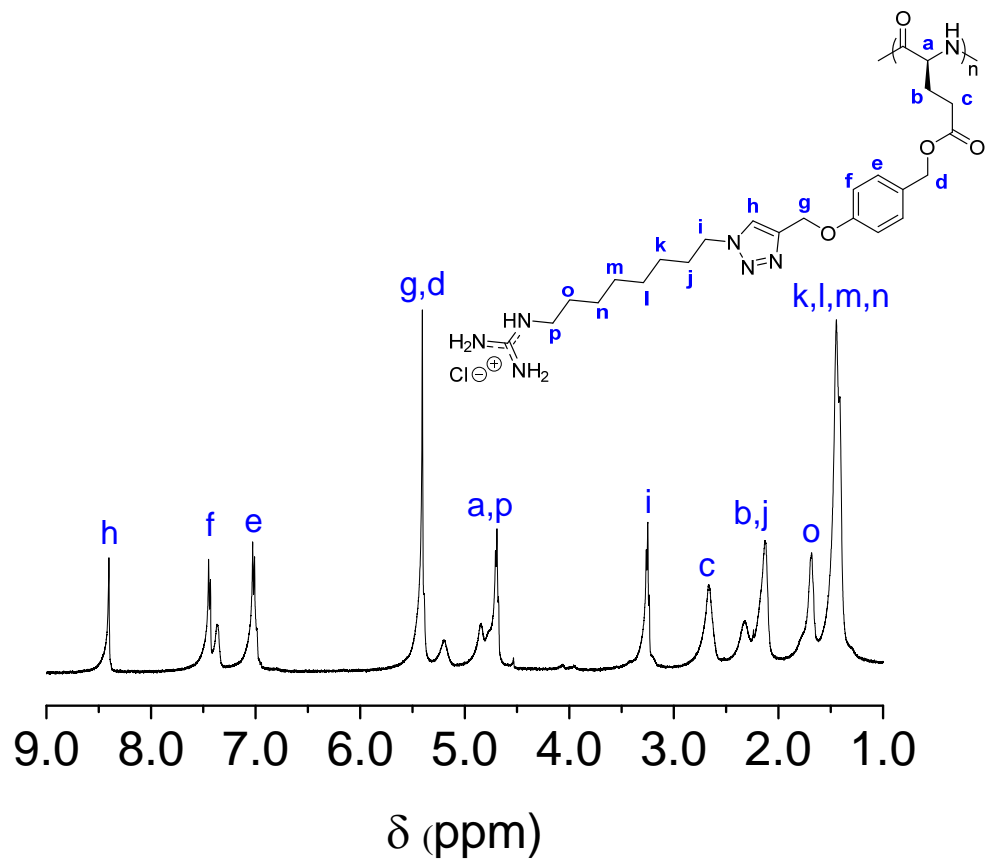

Fig. S6.  $^1\text{H}$  NMR spectrum of polypeptide G8 in  $\text{TFA-d}$ .

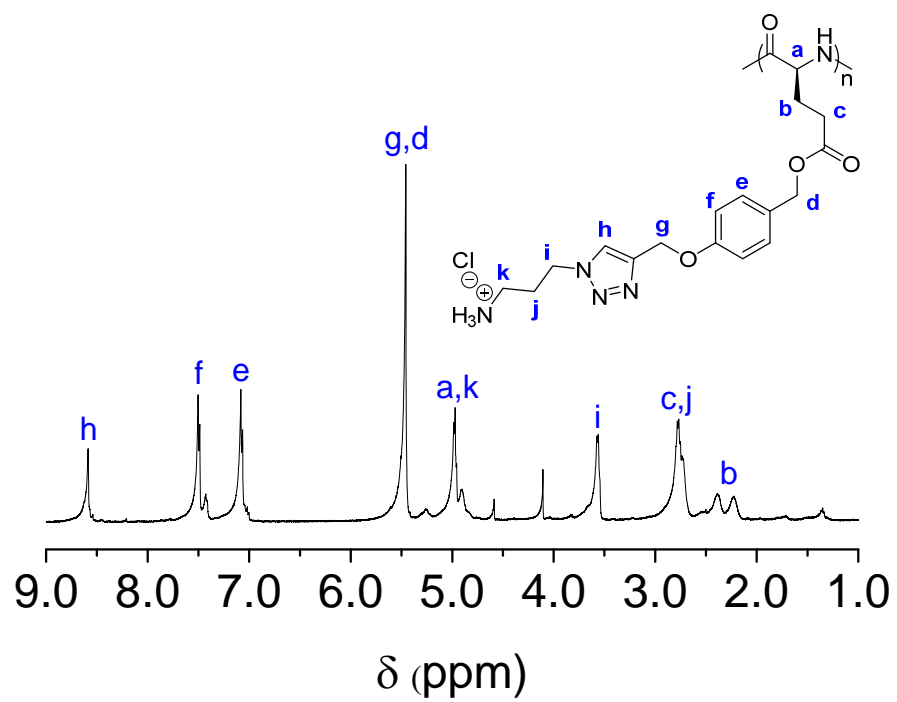

Fig. S7.  $^1\text{H}$  NMR spectrum of polypeptide P3 in  $\text{TFA-d}$ .



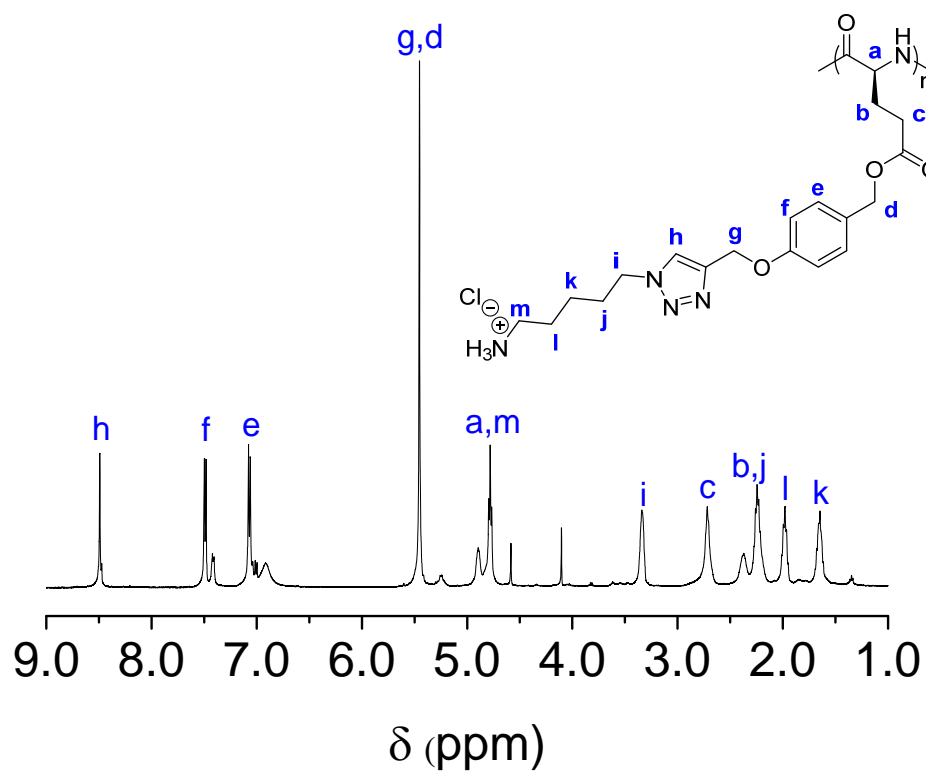

Fig. S8.  $^1\text{H}$  NMR spectrum of polypeptide P5 in  $\text{TFA-d}$ .

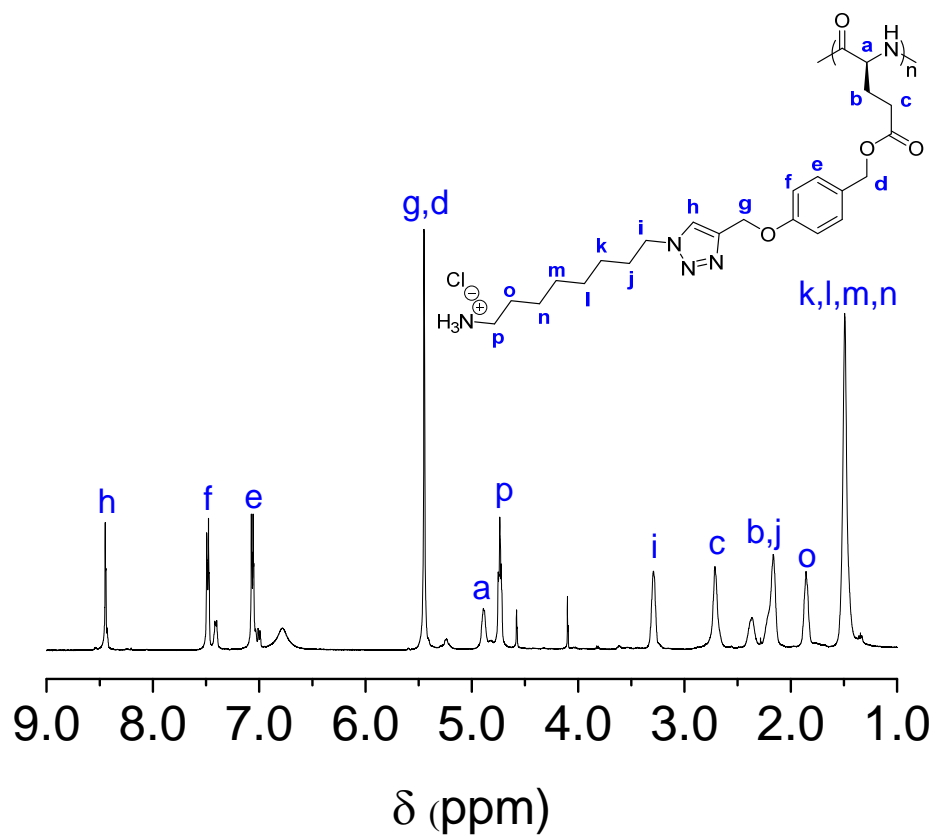

Fig. S9.  $^1\text{H}$  NMR spectrum of polypeptide P8 in  $\text{TFA-d}$ .

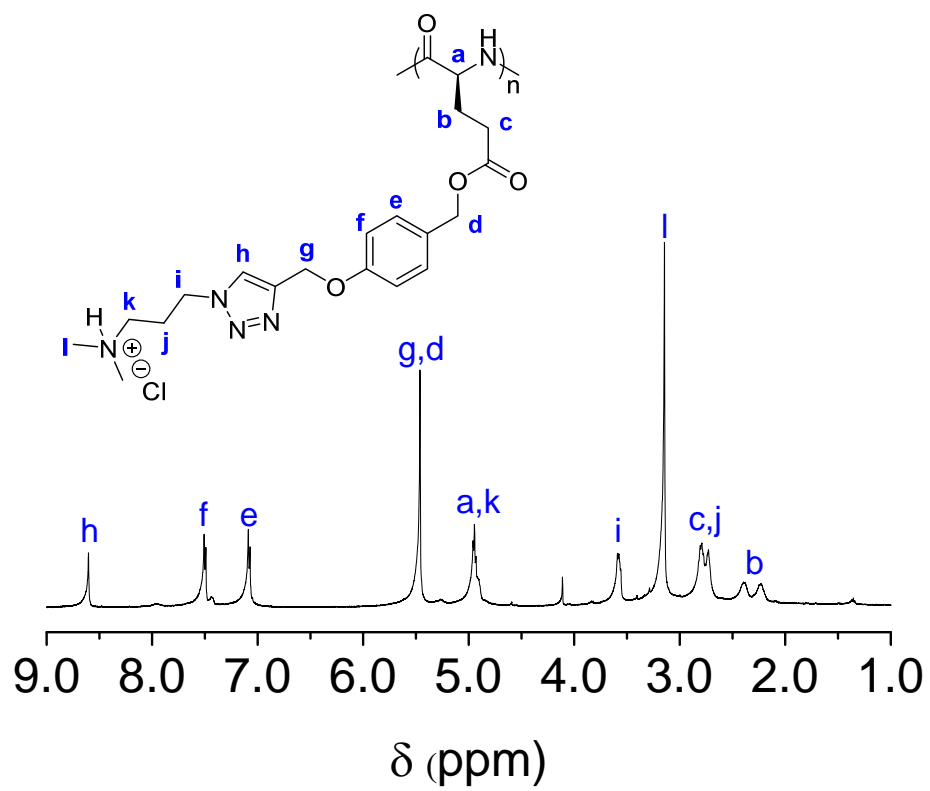

Fig. S10.  $^1\text{H}$  NMR spectrum of polypeptide T3 in TFA-*d*.

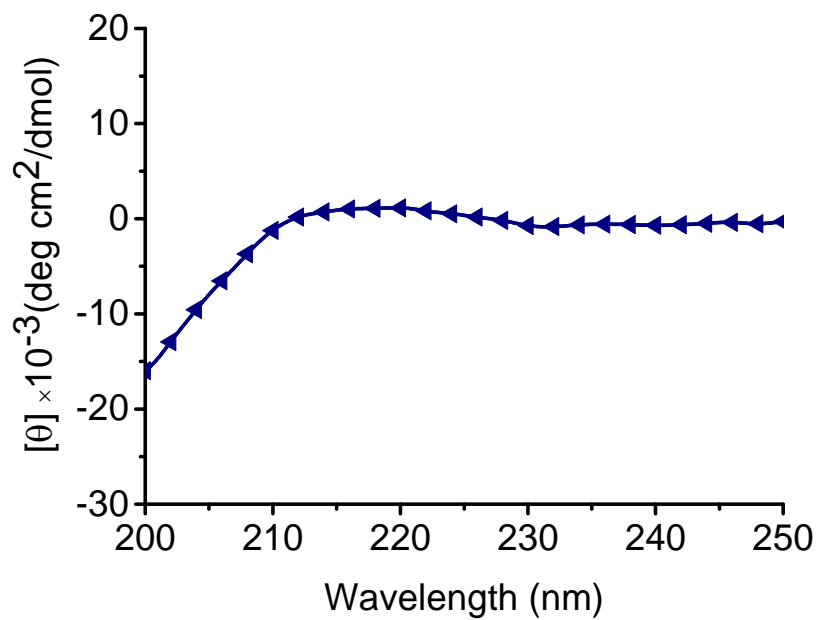

Fig. S11. CD spectrum of PLR in water (0.1 mg/mL) at pH 7.

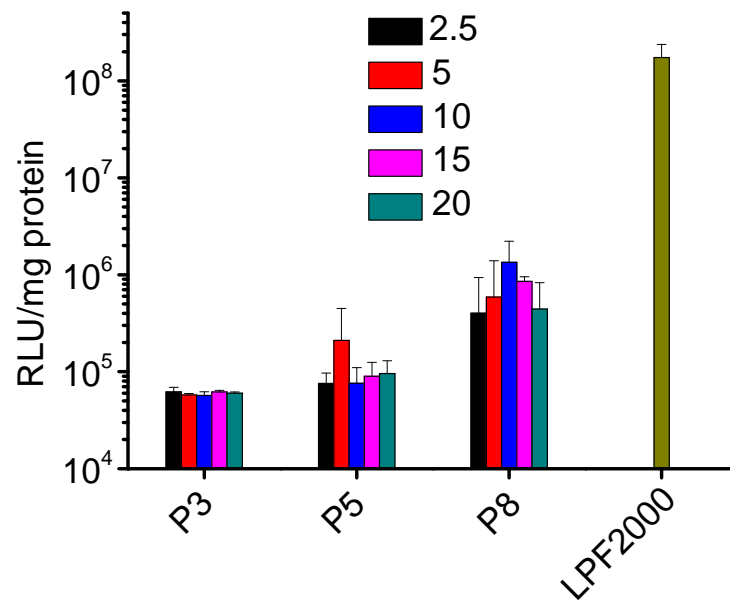

Fig. S12. *In vitro* transfection efficiencies of polyplexes at various N/P ratios in HeLa cells.

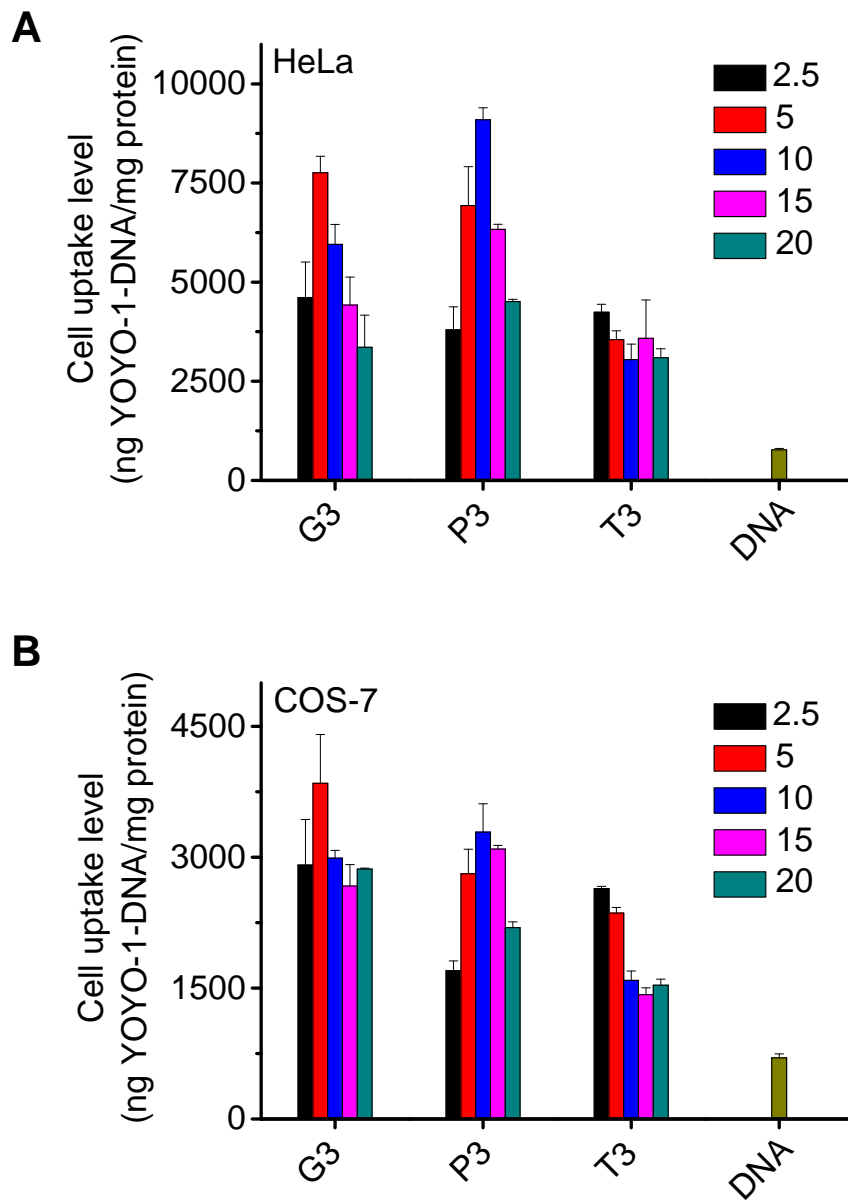

Fig. S13. Cellular uptake levels of polypeptide/YOYO-1-DNA polyplexes in HeLa (A) and COS-7 (B) cells at various N/P ratios.

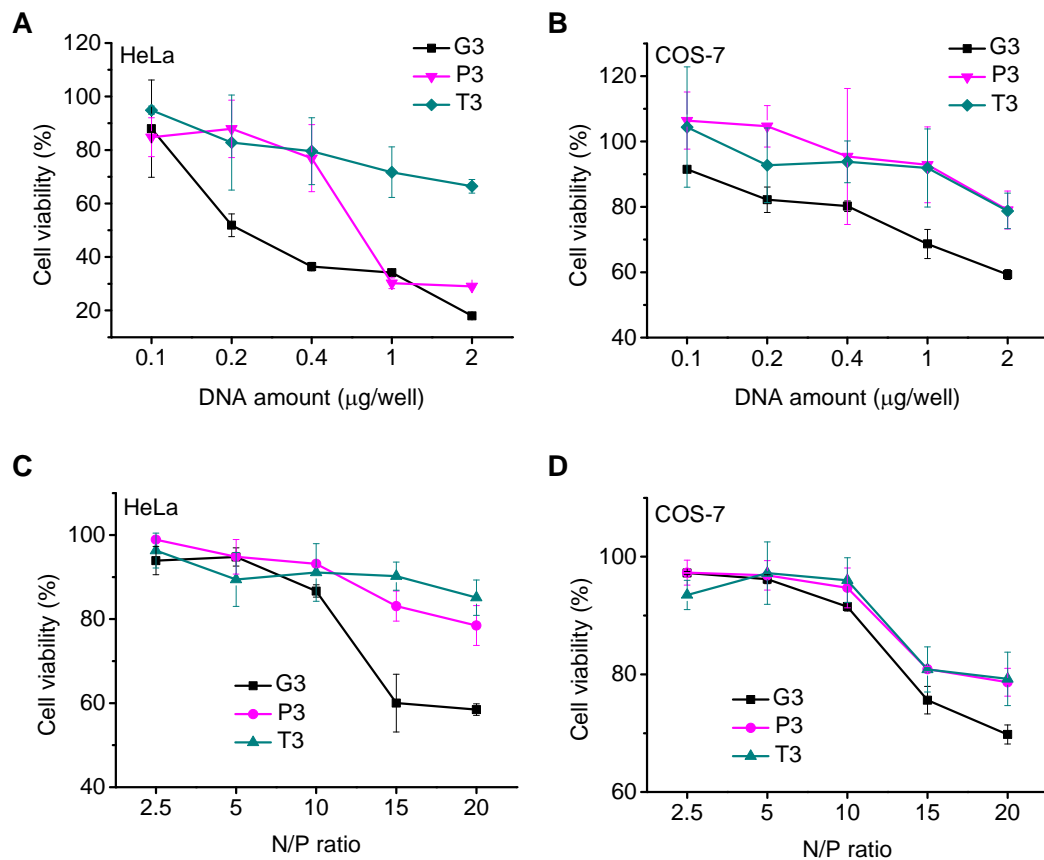

Fig. S14. Cytotoxicity of polypeptide/DNA polyplexes towards HeLa (A, C) and COS-7 (B, D) cells as determined by the MTT assay. The N/P ratio was maintained constant at 10 (A and B) while the DNA amount was maintained constant at 0.1 µg/well (C and D).
